# Supplementary material for: Association between pre- and post-diagnosis healthy eating index 2020 and ovarian cancer survival: evidence from a prospective cohort study
Source: Royal Society of Chemistry journal article supplement (doi:10.1039/d4fo02417f), 2024-01-01
Supplement: d4fo02417f1.pdf [file d4fo02417f1.pdf]

## Supplementary Materials

### Association between pre- and post-diagnosis Healthy Eating Index 2020 and ovarian cancer survival: evidence from a prospective cohort study

Jia-Cheng Liu, Fang-Hua Liu, De-Yu Zhang, Xiao-Ying Wang, Lang Wu, Yi-Zi Li, He-Li Xu, Yi-Fan Wei, Dong-Hui Huang, Xiao-Ying Li, Qian Xiao, Meng-Meng Xie, Pei-Chen Liu, Song Gao, Chuan Liu, Ning Liu, Ting-Ting Gong, Qi-Jun Wu

#### Table of contents

|                |                                                                                                                                                                                                                                                     |
|----------------|-----------------------------------------------------------------------------------------------------------------------------------------------------------------------------------------------------------------------------------------------------|
| <b>Page 3</b>  | <b>Supplementary Table S1:</b> Healthy Eating Index (HEI)-2020 components and scoring standards                                                                                                                                                     |
| <b>Page 5</b>  | <b>Supplementary Table S2:</b> Median (IQR) score of healthy eating index-2020 components according to tertiles of pre-diagnosis and post-diagnosis dietary scores (N = 549)                                                                        |
| <b>Page 7</b>  | <b>Supplementary Table S3:</b> Median (IQR) intake of healthy eating index-2020 components according to tertiles of pre-diagnosis and post-diagnosis dietary scores (N = 549)                                                                       |
| <b>Page 8</b>  | <b>Supplementary Table S4:</b> Association between selected clinical characteristics and total mortality among women diagnosed with ovarian cancer (N = 549)                                                                                        |
| <b>Page 9</b>  | <b>Supplementary Table S5:</b> Hazard Ratios (95% CI) for overall survival among patients with ovarian cancer by categories of healthy eating index-2020 score change groups (N = 549)                                                              |
| <b>Page 10</b> | <b>Supplementary Table S6:</b> Hazard Ratios (95% CI) for ovarian cancer patients according to healthy eating index-2020 score stratified by age at diagnosis, BMI, FIGO stage, histological type, menopausal status and residual lesions (N = 549) |
| <b>Page 12</b> | <b>Supplementary Table S7:</b> Hazard Ratios (95%CI) for overall survival among patients with ovarian cancer according to the 13 components of the healthy eating index-2020 (N = 549)                                                              |

|                |                                                                                                                                          |
|----------------|------------------------------------------------------------------------------------------------------------------------------------------|
| <b>Page 14</b> | <b>Supplementary Figure S1: Directed Acyclic Graph of the associations between Healthy Eating Index-2020 and ovarian cancer survival</b> |
|----------------|------------------------------------------------------------------------------------------------------------------------------------------|

**Supplementary Table S1. Healthy Eating Index (HEI)-2020 components and scoring standards <sup>1</sup>**

| Components                                | Maximum points | Standard for maximum score          | Standard for minimum score of zero  |
|-------------------------------------------|----------------|-------------------------------------|-------------------------------------|
|                                           |                | HEI-2020 applies to ages 2 and over |                                     |
| <b>Adequacy Components</b>                |                |                                     |                                     |
| Total Fruits <sup>2</sup>                 | 5              | ≥ 0.8 cup eq/1000 kcal              | No Fruit                            |
| Whole Fruits <sup>3</sup>                 | 5              | ≥ 0.4 cup eq/1000 kcal              | No Whole Fruit                      |
| Total Vegetables <sup>4</sup>             | 5              | ≥ 1.1 cup eq/1000 kcal              | No Vegetables                       |
| Greens and Beans <sup>4</sup>             | 5              | ≥ 0.2 cup eq/1000 kcal              | No Dark Green Vegetables or Legumes |
| Whole Grains                              | 10             | ≥ 1 .5 oz eq/1000 kcal              | No Whole Grains                     |
| Dairy <sup>5</sup>                        | 10             | ≥ 1.3 cup eq/1000 kcal              | No Dairy                            |
| Total Protein Foods <sup>6</sup>          | 5              | ≥ 2.5 oz eq/1000 kcal               | No Protein Foods                    |
| Seafood and Plant Proteins <sup>6,7</sup> | 5              | ≥ 0.8 oz eq/1000 kcal               | No Seafood or Plant Proteins        |
| Fatty Acids <sup>8</sup>                  | 10             | (PUFAs + MUFAs )/SFAs ≥ 2.5         | (PUFAs + MUFAs)/SFAs ≤ 1.2          |
| <b>Moderation components</b>              |                |                                     |                                     |
| Refined Grains                            | 10             | ≤ 1.8 oz eq/1000 kcal               | ≥ 4.3 oz eq/1000 kcal               |
| Sodium                                    | 10             | ≤ 1.1 g eq/1000 kcal                | ≥ 2.0 g eq/1000 kcal                |
| Added Sugars                              | 10             | < 6.5% of energy                    | ≥ 26% of energy                     |
| Saturated Fats                            | 10             | ≤ 8% of energy                      | ≥ 16% of energy                     |

eq, equivalents; g, grams; HEI, healthy eating index; MUFAS, monounsaturated fatty acids; oz, ounce; PUFAs, polyunsaturated fatty acids; SFAs, saturated fatty acids.

<sup>1</sup> The HEI-2020 components and scoring standards are the same as the HEI-2015. Intakes between the minimum and maximum standards are scored proportionately.

<sup>2</sup> Includes 100% fruit juice.

<sup>3</sup> Includes all forms except juice.

<sup>4</sup> Includes legumes (beans and peas).

<sup>5</sup> Includes all milk products, such as fluid milk, yogurt, and cheese, and fortified soy beverages.

<sup>6</sup> Includes legumes (beans and peas).

<sup>7</sup> Includes seafood, nuts, seeds, soy products (other than beverages), and beans, peas, and lentils.

<sup>8</sup> Ratio of poly- and monounsaturated fatty acids to saturated fatty acids.

**Supplementary Table S2. Median (IQR) score of healthy eating index-2020 <sup>1</sup> components according to tertiles of pre-diagnosis and post-diagnosis dietary scores (N = 549)**

| Components                                | Pre-diagnosis HEI score |                     |                     | <i>P</i> -value | Post-diagnosis HEI score |                     |                     | <i>P</i> -value |
|-------------------------------------------|-------------------------|---------------------|---------------------|-----------------|--------------------------|---------------------|---------------------|-----------------|
|                                           | Tertile 1               | Tertile 2           | Tertile 3           |                 | Tertile 1                | Tertile 2           | Tertile 3           |                 |
| Total                                     | 48.02 (44.39-49.69)     | 53.42 (52.58-54.76) | 58.62 (57.27-60.45) |                 | 50.43 (47.55-52.07)      | 55.07 (54.35-56.18) | 59.00 (57.66-61.48) |                 |
| Total Fruits <sup>2</sup>                 | 2.37 (1.40-3.95)        | 4.91 (3.23-5.00)    | 5.00 (4.63-5.00)    | < 0.01          | 3.84 (2.26-5.00)         | 5.00 (4.25-5.00)    | 5.00 (5.00-5.00)    | < 0.01          |
| Whole Fruits <sup>3</sup>                 | 4.18 (2.34-5.00)        | 5.00 (5.00-5.00)    | 5.00 (5.00-5.00)    | < 0.01          | 5.00 (3.93-5.00)         | 5.00 (5.00-5.00)    | 5.00 (5.00-5.00)    | < 0.01          |
| Total Vegetables <sup>4</sup>             | 4.18 (3.33-5.00)        | 5.00 (4.60-5.00)    | 5.00 (5.00-5.00)    | < 0.01          | 5.00 (3.64-5.00)         | 5.00 (5.00-5.00)    | 5.00 (5.00-5.00)    | < 0.01          |
| Greens and Beans <sup>4</sup>             | 3.60 (2.57-5.00)        | 4.87 (3.74-5.00)    | 5.00 (5.00-5.00)    | < 0.01          | 3.58 (2.15-5.00)         | 5.00 (3.69-5.00)    | 5.00 (4.97-5.00)    | < 0.01          |
| Whole Grains                              | 0.16 (0.07-0.37)        | 0.22 (0.12-0.44)    | 0.36 (0.11-0.82)    | < 0.01          | 0.24 (0.14-0.45)         | 0.37 (0.17-0.64)    | 0.44 (0.22-0.89)    | < 0.01          |
| Dairy <sup>5</sup>                        | 0.76 (0.31-2.39)        | 1.13 (0.30-2.84)    | 0.86 (0.00-2.89)    | 0.34            | 1.50 (0.39-3.47)         | 2.41 (0.86-4.26)    | 2.55 (0.75-4.42)    | < 0.01          |
| Total Protein Foods <sup>6</sup>          | 5.00 (4.37-5.00)        | 5.00 (5.00-5.00)    | 5.00 (5.00-5.00)    | < 0.01          | 5.00 (5.00-5.00)         | 5.00 (5.00-5.00)    | 5.00 (5.00-5.00)    | < 0.01          |
| Seafood and Plant Proteins <sup>6,7</sup> | 5.00 (5.00-5.00)        | 5.00 (5.00-5.00)    | 5.00 (5.00-5.00)    | < 0.01          | 5.00 (5.00-5.00)         | 5.00 (5.00-5.00)    | 5.00 (5.00-5.00)    | < 0.01          |
| Fatty Acids <sup>8</sup>                  | 1.75 (0.18-3.27)        | 3.16 (1.84-4.58)    | 6.32 (3.98-9.37)    | < 0.01          | 1.76 (0.26-3.30)         | 2.79 (1.15-4.50)    | 5.45 (2.76-7.48)    | < 0.01          |
| Refined Grains                            | 0.00 (0.00-0.00)        | 0.00 (0.00-0.00)    | 0.00 (0.00-0.99)    | < 0.01          | 0.00 (0.00-0.00)         | 0.00 (0.00-0.00)    | 0.25 (0.00-2.88)    | < 0.01          |
| Sodium                                    | 10.00 (10.00-10.00)     | 10.00 (10.00-10.00) | 10.00 (10.00-10.00) | 0.12            | 10.00 (10.00-10.00)      | 10.00 (10.00-10.00) | 10.00 (10.00-10.00) | 0.90            |
| Added Sugars                              | 10.00 (10.00-10.00)     | 10.00 (10.00-10.00) | 10.00 (10.00-10.00) | < 0.01          | 10.00 (10.00-10.00)      | 10.00 (10.00-10.00) | 10.00 (10.00-10.00) | < 0.01          |
| Saturated Fats                            | 0.00 (0.00-0.00)        | 0.00 (0.00-0.00)    | 0.00 (0.00-0.00)    | 0.13            | 0.00 (0.00-0.00)         | 0.00 (0.00-0.00)    | 0.00 (0.00-0.00)    | 0.25            |

HEI, healthy eating index; IQR, interquartile.

- <sup>1</sup> Intakes between the minimum and maximum standards are scored proportionately.
- <sup>2</sup> Includes 100% fruit juice.
- <sup>3</sup> Includes all forms except juice.
- <sup>4</sup> Includes legumes (beans and peas).
- <sup>5</sup> Includes all milk products, such as fluid milk, yogurt, and cheese, and fortified soy beverages.
- <sup>6</sup> Includes legumes (beans and peas).
- <sup>7</sup> Includes seafood, nuts, seeds, soy products (other than beverages), and legumes (beans and peas).
- <sup>8</sup> Ratio of poly- and monounsaturated fatty acids (PUFAs and MUFAs) to saturated fatty acids (SFAs).

**Supplementary Table S3. Median (IQR) intake of healthy eating index-2020 components according to tertiles of pre-diagnosis and post-diagnosis dietary scores (N = 549)**

| Components                                   | Pre-diagnosis HEI score |                     |                     | P-value | Post-diagnosis HEI score |                     |                     | P-value |
|----------------------------------------------|-------------------------|---------------------|---------------------|---------|--------------------------|---------------------|---------------------|---------|
|                                              | Tertile 1               | Tertile 2           | Tertile 3           |         | Tertile 1                | Tertile 2           | Tertile 3           |         |
| Total Fruits, cup eq/1000 kcal               | 0.38 (0.22-0.63)        | 0.79 (0.52-1.17)    | 0.99 (0.74-1.45)    | < 0.01  | 0.61 (0.36-0.97)         | 0.97 (0.68-1.35)    | 1.30 (0.97-1.72)    | < 0.01  |
| Whole Fruits, cup eq/1000 kcal               | 0.33 (0.19-0.57)        | 0.72 (0.46-1.07)    | 0.90 (0.65-1.39)    | < 0.01  | 0.52 (0.31-0.85)         | 0.86 (0.59-1.22)    | 1.21 (0.79-1.62)    | < 0.01  |
| Total Vegetables, cup eq/1000 kcal           | 0.92 (0.73-1.35)        | 1.27 (1.01-1.62)    | 1.66 (1.21-2.17)    | < 0.01  | 1.12 (0.80-1.51)         | 1.45 (1.19-1.76)    | 1.71 (1.39-2.03)    | < 0.01  |
| Greens and Beans, cup eq/1000 kcal           | 0.14 (0.10-0.21)        | 0.19 (0.15-0.27)    | 0.29 (0.20-0.40)    | < 0.01  | 0.14 (0.09-0.21)         | 0.20 (0.15-0.28)    | 0.25 (0.20-0.31)    | < 0.01  |
| Whole Grains, oz eq/1000 kcal                | 0.02 (0.01-0.06)        | 0.03 (0.02-0.07)    | 0.05 (0.02-0.12)    | < 0.01  | 0.04 (0.02-0.07)         | 0.06 (0.03-0.10)    | 0.07 (0.03-0.13)    | < 0.01  |
| Dairy, cup eq/1000 kcal                      | 0.10 (0.04-0.31)        | 0.15 (0.04-0.37)    | 0.11 (0.00-0.38)    | 0.34    | 0.19 (0.05-0.45)         | 0.31 (0.11-0.55)    | 0.33 (0.10-0.57)    | < 0.01  |
| Total Protein Foods, oz eq/1000 kcal         | 3.19 (2.19-4.52)        | 3.87 (2.95-5.00)    | 4.44 (3.25-5.48)    | < 0.01  | 3.69 (2.63-4.52)         | 4.70 (3.89-5.63)    | 4.74 (3.49-6.19)    | < 0.01  |
| Seafood and Plant Proteins, cup eq/1000 kcal | 1.53 (0.93-2.47)        | 2.13 (1.49-3.00)    | 3.01 (1.96-4.34)    | < 0.01  | 1.81 (1.08-2.63)         | 2.70 (1.82-3.72)    | 3.18 (2.14-4.31)    | < 0.01  |
| Fatty Acids, (PUFAs + MUFAs)/SFAs            | 1.43 (1.22-1.63)        | 1.61 (1.44-1.80)    | 2.02 (1.72-2.42)    | < 0.01  | 1.43 (1.23-1.63)         | 1.56 (1.35-1.78)    | 1.91 (1.56-2.17)    | < 0.01  |
| Refined Grains, oz eq/1000 kcal              | 6.33 (5.27-7.21)        | 5.94 (5.03-6.95)    | 5.12 (4.05-6.26)    | < 0.01  | 6.19 (5.10-7.32)         | 5.28 (4.66-6.22)    | 4.24 (3.58-5.32)    | < 0.01  |
| Sodium, g eq/1000 kcal                       | 0.60 (0.50-0.76)        | 0.64 (0.51-0.74)    | 0.66 (0.53-0.79)    | 0.07    | 0.63 (0.52-0.74)         | 0.69 (0.56-0.83)    | 0.70 (0.61-0.82)    | < 0.01  |
| Added Sugars, % of energy                    | 3.14 (1.25-6.13)        | 2.35 (1.03-4.19)    | 1.60 (0.38-3.57)    | < 0.01  | 3.13 (1.20-5.61)         | 3.04 (1.87-4.44)    | 2.97 (1.18-4.76)    | 0.36    |
| Saturated Fats, % of energy                  | 21.25 (18.13-24.55)     | 21.69 (18.75-25.58) | 22.37 (17.99-26.72) | 0.15    | 22.77 (18.87-26.17)      | 25.85 (22.04-28.31) | 25.67 (21.71-28.93) | < 0.01  |

eq, equivalents; g, grams; HEI, healthy eating index; IQR, interquartile; MUFAS, monounsaturated fatty acids; oz, ounce; PUFAs, polyunsaturated fatty acids; SFAs, saturated fatty acids.

**Supplementary Table S4. Association between selected clinical characteristics and total mortality among women diagnosed with ovarian cancer (N = 549)**

| <b>Characteristic</b>           | <b>No. of deaths/patients</b> | <b>HR (95% CI) *</b> |
|---------------------------------|-------------------------------|----------------------|
| <b>Age at diagnosis (years)</b> |                               |                      |
| ≤ 50                            | 77/205                        | 1.00 (Ref)           |
| > 50                            | 129/344                       | 0.89 (0.66, 1.19)    |
| <b>Histological type</b>        |                               |                      |
| HGSC                            | 165/397                       | 1.00 (Ref)           |
| Non-HGSC                        | 41/152                        | 1.01 (0.70-1.47)     |
| <b>FIGO stage</b>               |                               |                      |
| I-II                            | 45/221                        | 1.00 (Ref)           |
| III-IV                          | 161/328                       | 2.85 (1.98-4.11)     |
| <b>Residual lesions</b>         |                               |                      |
| No                              | 133/435                       | 1.00 (Ref)           |
| Yes                             | 73/114                        | 1.93 (1.43-2.61)     |
| <b>Comorbidities</b>            |                               |                      |
| No                              | 117/322                       | 1.00 (Ref)           |
| Yes                             | 89/227                        | 1.18 (0.88-1.56)     |

CI, confidence interval; FIGO, International Federation of Gynecology and Obstetrics stage; HR, hazard ratio; HGSC, high-grade serous carcinoma; Ref, reference.

\* Mutually adjusted for all other variables listed in the table.



**Supplementary Table S5. Hazard Ratios (95% CI) for overall survival among patients with ovarian cancer by categories of healthy eating index-2020 score change groups (N = 549)**

| <b>HEI score</b> | <b>Total cases, n</b> | <b>Deaths, n</b> | <b>HR (95% CI) *</b> |
|------------------|-----------------------|------------------|----------------------|
| High-High        | 166                   | 48               | 1.00 (Ref)           |
| Low-Low          | 166                   | 67               | 1.38 (0.78, 2.45)    |
| Low-High         | 108                   | 44               | 1.31 (0.72, 2.40)    |
| High-Low         | 109                   | 47               | 1.42 (0.91, 2.23)    |

CI, confidence interval; HEI, healthy eating index; HR, hazard ratio; Ref, reference.

\* Adjusted for age at diagnosis, education, income, initial smoking status, initial diet quality score, initial total energy intake, initial physical activity, initial body mass index, change in smoking status, change in physical activity, change in body mass index, change in total energy intake, FIGO stage, histological type, and residual lesions.

**Supplementary Table S6. Hazard Ratios (95% CI) for ovarian cancer patients according to healthy eating index-2020 score stratified by age at diagnosis, BMI, FIGO stage, histological type, menopausal status and residual lesions (N = 549)**

| Characteristics                     | Deaths/<br>Total | Pre-diagnosis HEI score  |                          | <i>P</i> for<br>interaction <sup>c</sup> | <i>P</i> for<br>interaction <sup>d</sup> | Deaths/<br>Total | Post-diagnosis HEI score |                          | <i>P</i> for<br>interaction <sup>c</sup> | <i>P</i> for<br>interaction <sup>d</sup> |
|-------------------------------------|------------------|--------------------------|--------------------------|------------------------------------------|------------------------------------------|------------------|--------------------------|--------------------------|------------------------------------------|------------------------------------------|
|                                     |                  | HR (95% CI) <sup>a</sup> | HR (95% CI) <sup>b</sup> |                                          |                                          |                  | HR (95% CI) <sup>a</sup> | HR (95% CI) <sup>b</sup> |                                          |                                          |
| <b>Age at diagnosis (years)</b>     |                  |                          |                          | 0.09                                     | 0.01                                     |                  |                          |                          | 0.21                                     | 0.07                                     |
| ≤ 50                                | 77/205           | 0.83 (0.48-1.42)         | 0.45 (0.24-0.83)         |                                          |                                          | 77/205           | 0.53 (0.30, 0.93)        | 0.50 (0.27, 0.92)        |                                          |                                          |
| > 50                                | 129/344          | 1.15 (0.74, 1.79)        | 0.95 (0.60, 1.50)        |                                          |                                          | 129/344          | 0.71 (0.45, 1.13)        | 0.78 (0.51, 1.19)        |                                          |                                          |
| <b>Body mass index <sup>e</sup></b> |                  |                          |                          | 0.87                                     | 0.53                                     |                  |                          |                          | 0.99                                     | 0.05                                     |
| Normal                              | 131/353          | 1.22 (0.79, 1.87)        | 0.62 (0.39, 0.99)        |                                          |                                          | 172/332          | 0.76 (0.52, 1.11)        | 0.72 (0.50, 1.05)        |                                          |                                          |
| Overweight                          | 75/196           | 0.56 (0.32, 0.98)        | 0.70 (0.39, 1.26)        |                                          |                                          | 34/217           | 0.59 (0.24, 1.48)        | 0.42 (0.17, 1.02)        |                                          |                                          |
| <b>FIGO stage</b>                   |                  |                          |                          | 0.18                                     | 0.49                                     |                  |                          |                          | 0.67                                     | 0.88                                     |
| I-II                                | 45/221           | 0.35 (0.16, 0.79)        | 0.41 (0.20, 0.85)        |                                          |                                          | 45/221           | 0.42 (0.20, 0.91)        | 0.56 (0.26, 1.21)        |                                          |                                          |
| III-IV                              | 161/328          | 1.28 (0.88, 1.85)        | 0.76 (0.50, 1.15)        |                                          |                                          | 161/328          | 0.67 (0.44, 1.00)        | 0.68 (0.46, 1.00)        |                                          |                                          |
| <b>Histological type</b>            |                  |                          |                          | 0.79                                     | 0.60                                     |                  |                          |                          | 0.80                                     | 0.60                                     |
| HGSC                                | 165/397          | 1.03 (0.71, 1.50)        | 0.69 (0.47, 1.03)        |                                          |                                          | 171/419          | 0.76 (0.52, 1.12)        | 0.69 (0.48, 1.01)        |                                          |                                          |
| Non-HGSC                            | 41/152           | 0.65 (0.28, 1.50)        | 0.48 (0.20, 1.15)        |                                          |                                          | 35/130           | 0.30 (0.11, 0.78)        | 0.61 (0.27, 1.40)        |                                          |                                          |
| <b>Menopausal status</b>            |                  |                          |                          | 0.91                                     | 0.61                                     |                  |                          |                          | 0.90                                     | 0.59                                     |
| Yes                                 | 141/383          | 1.04 (0.69, 1.57)        | 0.69 (0.45, 1.06)        |                                          |                                          | 141/383          | 0.66 (0.42, 1.03)        | 0.69 (0.46, 1.03)        |                                          |                                          |
| No                                  | 65/166           | 0.92 (0.50, 1.68)        | 0.73 (0.36, 1.47)        |                                          |                                          | 65/166           | 0.61 (0.32, 1.17)        | 0.94 (0.46, 1.90)        |                                          |                                          |
| <b>Residual lesions</b>             |                  |                          |                          | 0.24                                     | 0.95                                     |                  |                          |                          | 0.70                                     | 0.83                                     |
| Yes                                 | 73/114           | 1.07 (0.59, 1.93)        | 0.65 (0.36, 1.19)        |                                          |                                          | 73/114           | 0.60 (0.32, 1.10)        | 0.71 (0.40, 1.27)        |                                          |                                          |

---

CI, confidence interval; FIGO, International Federation of Gynecology and Obstetrics stage; HEI, healthy eating index; HGSC, high-grade serous carcinoma; HR, hazard ratio.

The Cox model stratified by age at diagnosis, body mass index, the FIGO stage, histological type, and residual lesions, with additional adjustments for age at diagnosis, body mass index (pre- and post-diagnosis), total energy intake (pre- and post-diagnosis), physical activity (pre- and post-diagnosis), cigarette smoking (pre- and post-diagnosis), education, income, histological type, FIGO stage, and residual lesions.

<sup>a</sup> Hazard ratio and 95% confidence interval (tertile 2 vs. tertile 1).

<sup>b</sup> Hazard ratio and 95% confidence interval (tertile 3 vs. tertile 1).

<sup>c</sup> *P*-value of the multiplicative interaction.

<sup>d</sup> *P*-value of the additive interaction.

<sup>e</sup> Normal, body mass index  $\leq 23.9\text{kg/m}^2$ ; overweight, body mass index  $> 23.9\text{kg/m}^2$

**Supplementary Table S7. Hazard Ratios (95%CI) for overall survival among patients with ovarian cancer according to the 13 components of the healthy eating index-2020 (N = 549) \***

| <b>Components</b>                         | <b>Pre-diagnosis HR (95%CI) <sup>1</sup></b> | <b>Post-diagnosis HR (95%CI) <sup>1</sup></b> |
|-------------------------------------------|----------------------------------------------|-----------------------------------------------|
| <b>Adequacy Components <sup>2</sup></b>   |                                              |                                               |
| Total Fruits                              | 1.01 (0.78-1.31)                             | 0.86 (0.67-1.10)                              |
| Whole Fruits                              | 0.84 (0.64-1.09)                             | 0.99 (0.78-1.25)                              |
| Total Vegetables                          | 0.99 (0.82-1.19)                             | 0.94 (0.80-1.11)                              |
| Greens and Beans                          | 1.04 (0.88-1.24)                             | 0.77 (0.65-0.90)                              |
| Whole Grains                              | 0.97 (0.83-1.12)                             | 1.04 (0.89-1.20)                              |
| Dairy                                     | 1.00 (0.85-1.18)                             | 0.95 (0.79-1.14)                              |
| Total Protein Foods                       | 0.92 (0.75-1.12)                             | 0.92 (0.78-1.09)                              |
| Seafood and Plant Proteins                | 1.15 (0.94-1.42)                             | 1.07 (0.94-1.21)                              |
| Fatty Acids                               | 0.78 (0.65-0.94)                             | 1.01 (0.83-1.22)                              |
| <b>Moderation components <sup>3</sup></b> |                                              |                                               |
| Refined Grains                            | 0.92 (0.77-1.12)                             | 1.07 (0.92-1.24)                              |
| Sodium                                    | 1.07 (0.89-1.28)                             | 1.07 (0.89-1.29)                              |
| Added Sugars                              | 1.04 (0.89-1.21)                             | 0.93 (0.81-1.07)                              |
| Saturated Fats                            | 0.89 (0.75-1.07)                             | 0.92 (0.80-1.06)                              |

CI, confidence interval; HR, hazard ratio.

\* Multivariable models are mutually adjusted for the 13 HEI components and are also adjusted for age at diagnosis, body mass index, total energy intake, physical activity, cigarette smoking, education, income, FIGO stage, histological type, and residual lesions.

<sup>1</sup> The hazard ratio is based on a one-unit change in the score for the component of interest.

<sup>2</sup> Constitutes food groupings with recommended minimum intakes (regarded as healthful foods).

<sup>3</sup> Constitutes food groupings with recommended maximum intakes (regarded as unhealthful

foods); this component is reverse scored, with lower consumption levels awarded higher scores.

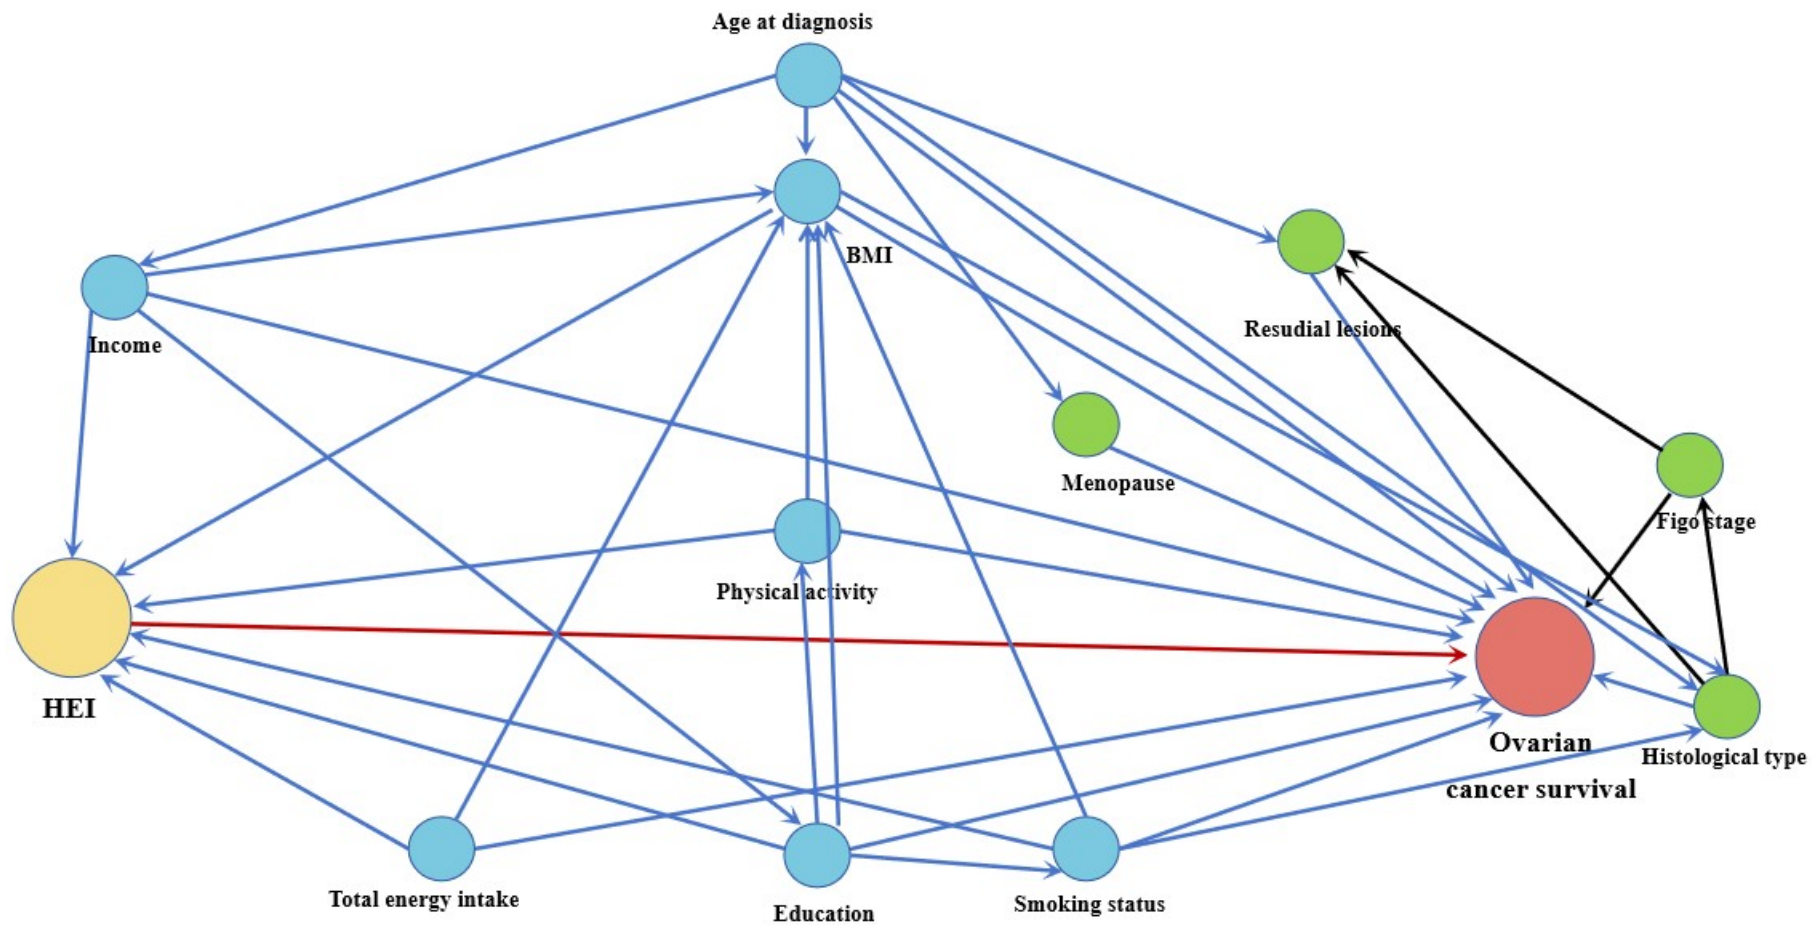

**Supplementary Figure S1. Directed Acyclic Graph of the associations between Healthy Eating Index-2020 and ovarian cancer survival**

The directed acyclic graph represents associations between covariates and primary exposure and outcome. Blue circles represent ancestors of exposure and outcome (ie, confounders), green circles represent ancestors of the outcome (ie, causal determinants of the outcome). Red lines represent causal paths, blue lines represent biasing paths. The minimally sufficient adjustment set represents covariates such that the adjustment for this set of variables will minimize confounding bias when estimating the association between the exposure and the outcome. The final minimally sufficient adjustment set comprised age at diagnosis, body mass index, education, income,

physical activity, smoking status, total energy intake<sup>1-17</sup>.

## Reference

1. Dunneram Y, Greenwood DC, Cade JE. Diet, menopause and the risk of ovarian, endometrial and breast cancer. *Proc Nutr Soc* **78**(3):438-48 (2019)
2. Bae HS, Kim HJ, Hong JH, Lee JK, Lee NW, Song JY. Obesity and epithelial ovarian cancer survival: a systematic review and meta-analysis. *J Ovarian Res* **7**:41 (2014)
3. Fortner RT, Trewin-Nybraten CB, Paulsen T, Langseth H. Characterization of ovarian cancer survival by histotype and stage: A nationwide study in Norway. *Int J Cancer* **153**(5):969-78 (2023)
4. Jones TL, Sandler CX, Spence RR, Hayes SC. Physical activity and exercise in women with ovarian cancer: A systematic review. *Gynecol Oncol* **158**(3):803-11 (2020)
5. van der Burg ME. Advanced ovarian cancer. *Curr Treat Options Oncol* **2**(2):109-18 (2001)
6. Zlatkov V. [Histological subtypes of ovarian carcinoma and their importance for clinical prognosis]. *Akush Ginekol (Sofia)* **54**(2):19-23 (2015)
7. Zhou A, Minlikeeva AN, Khan S, Moysich KB. Association between Cigarette Smoking and Histotype-Specific Epithelial Ovarian Cancer: A Review of Epidemiologic Studies. *Cancer Epidemiol Biomarkers Prev* **28**(7):1103-16 (2019)
8. Altman AD, Lambert P, Love AJ, Turner D, Lotocki R, Dean E, et al. Examining the Effects of Time to Diagnosis, Income, Symptoms, and Incidental Detection on Overall Survival in Epithelial Ovarian Cancer: Manitoba Ovarian Cancer Outcomes (MOCO) Study Group. *Int J Gynecol Cancer* **27**(8):1637-44 (2017)
9. Pan SY, DesMeules M. Energy intake, physical activity, energy balance, and cancer: epidemiologic evidence. *Methods Mol Biol* **472**:191-215 (2009)
10. Elshami M, Tuffaha A, Yaseen A, Alser M, Al-Slaibi I, Jabr H, et al. Awareness of ovarian cancer risk and protective factors: A national cross-sectional study from Palestine. *PLoS One* **17**(3):e0265452 (2022)
11. Zheng K, Gao W, Cao W, Lv J, Yu C, Wang S, et al. Education, income, and obesity: A nationwide Chinese twin study. *Obesity (Silver Spring)* **30**(4):931-42 (2022)
12. Hayes AM, Bulat J. Disabilities Inclusive Education Systems and Policies Guide for Low- and Middle-Income Countries. RTI Press Occasional Papers. Research Triangle Park (NC)2017.

13. Mattes R. Energy intake and obesity: ingestive frequency outweighs portion size. *Physiol Behav* **134**:110-8 (2014)
14. Nakamura S, Inayama T, Hata K, Matsushita M, Takahashi M, Harada K, et al. Association of household income and education with eating behaviors in Japanese adults: a cross-sectional study. *BMC Public Health* **16**:61 (2016)
15. Zbronska I, Medrela-Kuder E. The level of physical activity in elderly persons with overweight and obesity. *Rocz Panstw Zakl Hig* **69**(4):369-73 (2018)
16. Sadighi J, Montazeri A, Jahangiri K. Towards a Holistic Approach to Healthy Diet: Evidence from Iranian Health Perception Study. *Iran J Public Health* **43**(6):828-34 (2014)
17. McClure JB, Divine G, Alexander G, Tolsma D, Rolnick SJ, Stopponi M, et al. A comparison of smokers' and nonsmokers' fruit and vegetable intake and relevant psychosocial factors. *Behav Med* **35**(1):14-22 (2009)
